# Supplementary material for: Methods for discovering genomic loci exhibiting complex patterns of differential methylation
Source: PubMed Central journal article supplement (PMC5604413; doi:10.1186/s12859-017-1836-0), 2017-09-18
Supplement: 12859_2017_1836_MOESM1_ESM.pdf [file 12859_2017_1836_MOESM1_ESM.pdf]

## METHODS

# Methods for discovering genomic loci exhibiting complex patterns of differential methylation; Supplementary Materials

Thomas J Hardcastle

Correspondence: [tjh48@cam.ac.uk](mailto:tjh48@cam.ac.uk)  
 Department of Plant Sciences,  
 University of Cambridge, Downing  
 Street, CB2 3EA Cambridge, UK  
 Full list of author information is  
 available at the end of the article

## Simulation studies

Data are simulated using WGBSSuite version 0.4, modified to include the effect of non-conversion rates by introducing a binomially distributed error in the number of methylated cytosines reported at each site. Plant-representative parameters were estimated by applying the `analyse_WGBS.R` script provided by WGBSSuite to the first million CpG cytosines on chromosome 1 of a single wild-type sample and the *dcl2/3/4* triple mutant in the Stroud *et al*[?] dataset. Data were then simulated for one hundred thousand cytosines using the following command, where XXX and YYY are placeholders for the number of samples in each replicate group and the magnitude of difference in the proportion of methylation respectively.

```
Rscript simulate_WGBS.R 100000 0.851721358101034 0.0158503393648432
+0.2 0.2 14.064221221 14.064221221 XXX 2 YYY 0.5
+0.0267845702643185,0.00339225464276114 plant_simulation binomial
+0.237414948538599,1e-15 0.0577772070946612,0.34
```

Version 0.4.4 of methylSig, 1.14 of methylKit, 1.10.0 of BSmooth and 3.4.2 of MethPipe were used to analyse these data using default settings for all libraries. Versions 2.9.5 of segmentSeq and 2.8.0 of baySeq were used to implement the approach described here.

## References

- Stroud, H., Greenberg, M.C., Feng, S., Bernatavichute, Y., Jacobsen, S.: Comprehensive Analysis of Silencing Mutants Reveals Complex Regulation of the Arabidopsis Methylome. *Cell* **152**(1), 352–364 (2013). doi:10.1016/j.cell.2012.10.054

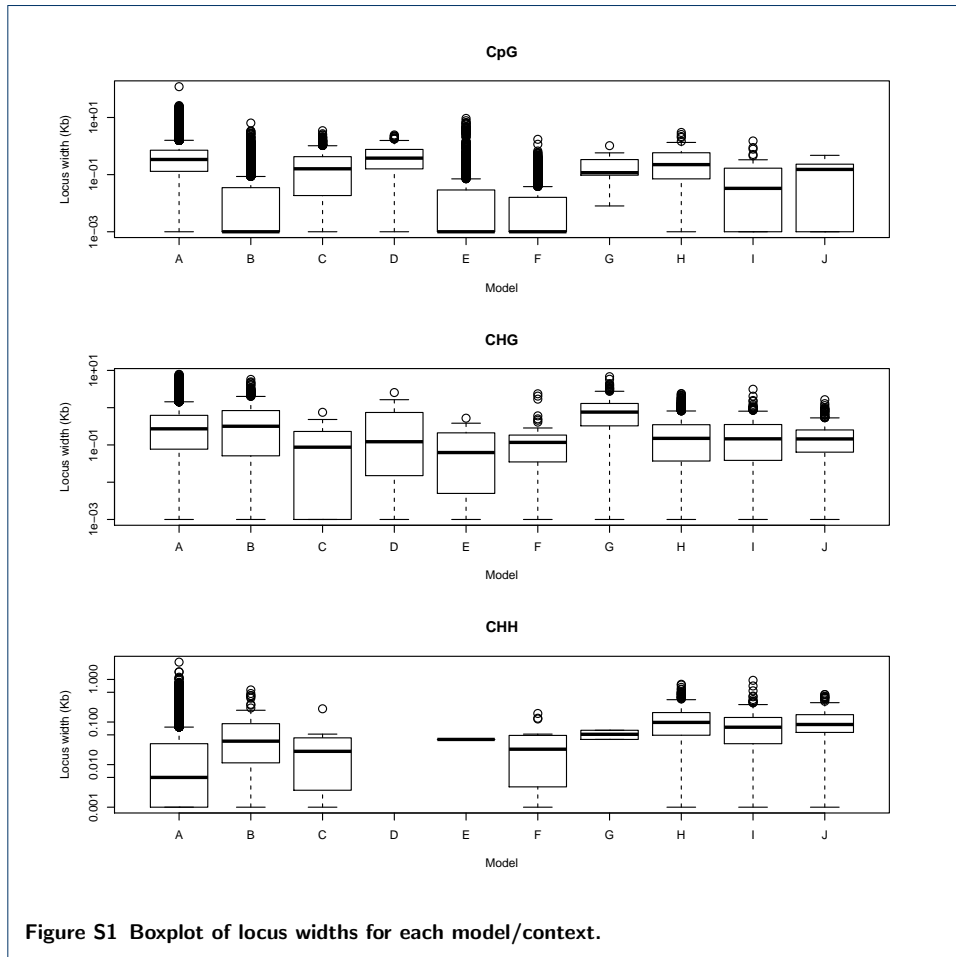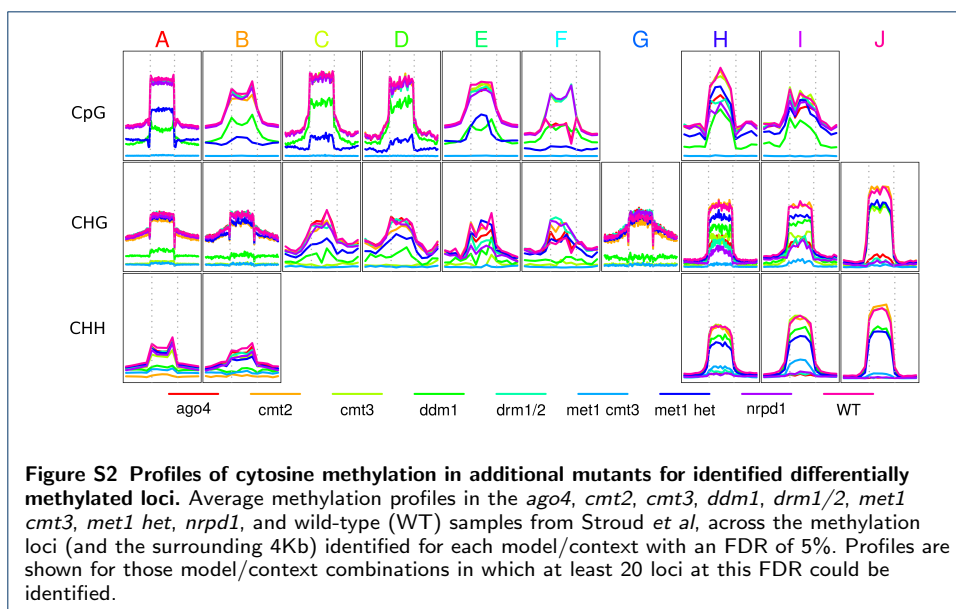

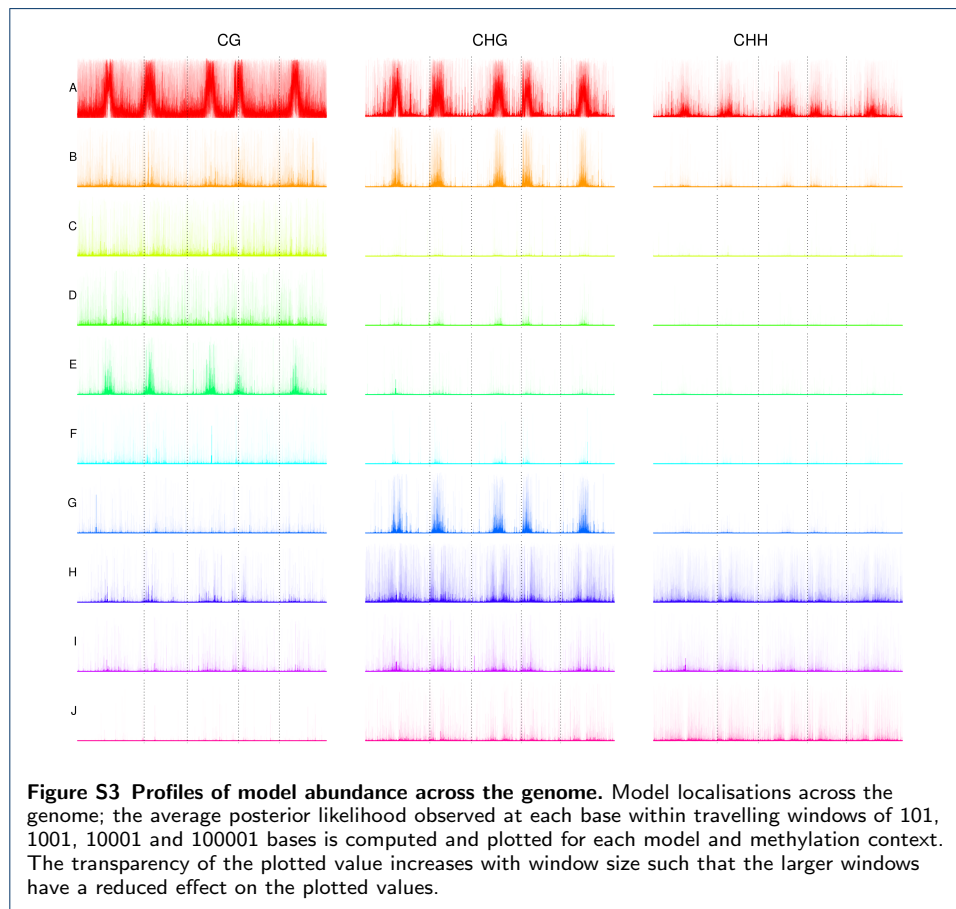

**Table S1** Numbers of loci associated with models of differential methylation.

| Model ID | Model definition                        | Estimated number of loci                | Number of identified loci (FDR < 0.05) |
|----------|-----------------------------------------|-----------------------------------------|----------------------------------------|
| A        | {WT,dcl2/3/4,dcl2/4,dcl3,dcl2,dcl4}     | CpG: 67365<br>CHG: 53313<br>CHH: 138593 | CpG: 17607<br>CHG: 9310<br>CHH: 30058  |
| B        | {WT,dcl2/3/4,dcl2/4,dcl3,dcl4}>{dcl2}   | CpG: 10769<br>CHG: 5459<br>CHH: 4686    | CpG: 3587<br>CHG: 996<br>CHH: 137      |
| C        | {WT}>{dcl2/3/4,dcl2/4,dcl3,dcl2,dcl4}   | CpG: 8624<br>CHG: 692<br>CHH: 2290      | CpG: 119<br>CHG: 2<br>CHH: 4           |
| D        | {WT,dcl2/3/4,dcl2/4,dcl2,dcl4}>{dcl3}   | CpG: 6989<br>CHG: 644<br>CHH: 1383      | CpG: 1499<br>CHG: 27<br>CHH: 3         |
| E        | {WT,dcl2/3/4,dcl2/4,dcl3,dcl2}>{dcl4}   | CpG: 6906<br>CHG: 631<br>CHH: 1306      | CpG: 877<br>CHG: 41<br>CHH: 9          |
| F        | {dcl3}>{WT,dcl2/3/4,dcl2/4,dcl2,dcl4}   | CpG: 6131<br>CHG: 866<br>CHH: 1527      | CpG: 73<br>CHG: 1<br>CHH: 1            |
| G        | {WT,dcl2/3/4,dcl2/4,dcl4}>{dcl3,dcl2}   | CpG: 5167<br>CHG: 654<br>CHH: 1672      | CpG: 74<br>CHG: 24<br>CHH: 3           |
| H        | {dcl2/3/4,dcl2/4,dcl3,dcl2,dcl4}>{WT}   | CpG: 3665<br>CHG: 797<br>CHH: 614       | CpG: 1890<br>CHG: 43<br>CHH: 20        |
| I        | {WT,dcl2/3/4,dcl2/4,dcl3}>{dcl2,dcl4}   | CpG: 2532<br>CHG: 738<br>CHH: 855       | CpG: 281<br>CHG: 28<br>CHH: 1          |
| J        | {WT,dcl2/3/4,dcl2/4}>{dcl3,dcl2,dcl4}   | CpG: 2365<br>CHG: 331<br>CHH: 307       | CpG: 175<br>CHG: 1<br>CHH: 1           |
| K        | {WT,dcl2/4,dcl2,dcl4}>{dcl2/3/4,dcl3}   | CpG: 2208<br>CHG: 8384<br>CHH: 13657    | CpG: 62<br>CHG: 2314<br>CHH: 542       |
| L        | {WT,dcl2/3/4,dcl2/4,dcl2}>{dcl3,dcl4}   | CpG: 1564<br>CHG: 229<br>CHH: 462       | CpG: 79<br>CHG: 7<br>CHH: 1            |
| M        | {WT,dcl2/3/4,dcl2/4,dcl3}>{dcl4}>{dcl2} | CpG: 968<br>CHG: 9<br>CHH: 15           | CpG: 218<br>CHG: 1<br>CHH: 1           |
| N        | {WT,dcl2/4,dcl3,dcl2}>{dcl2/3/4}>{dcl4} | CpG: 596<br>CHG: 7<br>CHH: 21           | CpG: 92<br>CHG: 1<br>CHH: 1            |
| O        | {WT,dcl2/3/4,dcl3,dcl2}>{dcl2/4}>{dcl4} | CpG: 435<br>CHG: 2<br>CHH: 5            | CpG: 62<br>CHG: 1<br>CHH: 1            |
| P        | {WT,dcl3,dcl2,dcl4}>{dcl2/4}>{dcl2/3/4} | CpG: 306<br>CHG: 12<br>CHH: 42          | CpG: 74<br>CHG: 1<br>CHH: 1            |
| Q        | {WT,dcl3,dcl2,dcl4}>{dcl2/3/4}>{dcl2/4} | CpG: 301<br>CHG: 5<br>CHH: 14           | CpG: 75<br>CHG: 1<br>CHH: 1            |
| R        | {dcl2/4}>{WT,dcl2/3/4,dcl3,dcl2,dcl4}   | CpG: 2623<br>CHG: 3351<br>CHH: 4726     | CpG: 7<br>CHG: 153<br>CHH: 1           |
| S        | {WT,dcl2/4,dcl3,dcl2,dcl4}>{dcl2/3/4}   | CpG: 2298<br>CHG: 3220<br>CHH: 6387     | CpG: 47<br>CHG: 360<br>CHH: 255        |
| T        | {dcl2/3/4,dcl2/4,dcl3,dcl4}>{WT,dcl2}   | CpG: 1661<br>CHG: 2745<br>CHH: 1219     | CpG: 16<br>CHG: 337<br>CHH: 3          |
| U        | {WT,dcl2/4,dcl2,dcl4}>{dcl3}>{dcl2/3/4} | CpG: 207<br>CHG: 1746<br>CHH: 5435      | CpG: 10<br>CHG: 308<br>CHH: 307        |
| V        | {WT,dcl2/4,dcl4}>{dcl2/3/4,dcl3,dcl2}   | CpG: 1719<br>CHG: 1315<br>CHH: 2831     | CpG: 12<br>CHG: 63<br>CHH: 37          |
| W        | {dcl2/3/4,dcl2/4,dcl3}>{WT,dcl2,dcl4}   | CpG: 2189<br>CHG: 1260<br>CHH: 606      | CpG: 35<br>CHG: 54<br>CHH: 1           |
| X        | {WT,dcl2/3/4,dcl3,dcl2,dcl4}>{dcl2/4}   | CpG: 1237<br>CHG: 757<br>CHH: 1886      | CpG: 51<br>CHG: 79<br>CHH: 3           |
